# Supplementary material for: Dietary methionine restriction improves gut microbiota composition and prevents cognitive impairment ind-galactose-induced aging mice
Source: Royal Society of Chemistry journal article supplement (doi:10.1039/d2fo03366f), 2022-01-01
Supplement: d2fo03366f1.pdf [file d2fo03366f1.pdf]

## 1 Supporting information

### 2 Supplemental Tables

3 Table S1 The compositions of the experimental diets (g/100g)

| Ingredient               | CON <sup>1</sup> | D+CON <sup>2</sup> | D+MR <sup>3</sup> |
|--------------------------|------------------|--------------------|-------------------|
| Soy protein <sup>4</sup> | 7.59             | 7.59               | 7.59              |
| L-Arginine               | 0.66             | 0.66               | 0.66              |
| L-Histidine              | 0.18             | 0.18               | 0.18              |
| L-Isoleucine             | 0.51             | 0.51               | 0.51              |
| L-Leucine                | 0.64             | 0.64               | 0.64              |
| L-Lysine                 | 0.11             | 0.11               | 0.11              |
| L-Methionine             | 0.69             | 0.69               | 0.00              |
| L-Phenylalanine          | 0.85             | 0.85               | 0.85              |
| L-Threonine              | 0.65             | 0.65               | 0.65              |
| L-Tryptophan             | 0.10             | 0.10               | 0.10              |
| L-Valine                 | 0.57             | 0.57               | 0.57              |
| L-Glutamic acid          | 1.37             | 1.37               | 2.06              |
| L-Glycine                | 2.08             | 2.08               | 2.08              |
| Corn starch              | 64.09            | 64.09              | 64.09             |
| maltodextrin             | 5.00             | 5.00               | 5.00              |
| Sucrose                  | 0.10             | 0.10               | 0.10              |
| Soybean oil              | 2.00             | 2.00               | 2.00              |
| Pork Lard                | 2.20             | 2.20               | 2.20              |

|                         |        |        |        |
|-------------------------|--------|--------|--------|
| Cellulose               | 5.00   | 5.00   | 5.00   |
| Mineral mixture-AIN-76A | 3.50   | 3.50   | 3.50   |
| Mineral vitamin-AIN-76A | 1.00   | 1.00   | 1.00   |
| Choline chloride        | 0.11   | 0.11   | 0.11   |
| CMC                     | 1.00   | 1.00   | 1.00   |
| Total                   | 100.00 | 100.00 | 100.00 |

4 <sup>1</sup>CON, control diet, was mainly based upon the AIN-76A formulation.

5 <sup>2</sup>D+CON, control diet, was mainly based upon the AIN-76A formulation.

6 <sup>3</sup>D+MR, control diet in which methionine was restricted from 0.86% to 0.17%. The glutamic acid was  
7 increased to compensate for the reduced methionine content and to create equal amounts of total amino  
8 acids.

9 <sup>4</sup>Amino acid composition of soy protein was as follows: 6.19% leucine, 4.11% isoleucine, 5.49%  
10 valine, 1.18% methionine, 1.66% cysteine, 4.09% phenylalanine, 2.57% tyrosine, 4.83% lysine, 2.21%  
11 threonine, 1.07% tryptophan, 1.99% histidine, 6.11% arginine, 3.30% serine, 3.25% alanine, 5.56%  
12 proline, 3.27% glycine, 17.49% glutamic acid 9.44% aspartic acid. 1 g cysteine is equal to 0.64 g  
13 methionine.<sup>1</sup>

14

15 Table S2 Sequence of primers in quantitative real-time reverse transcription polymerase chain reaction

| Genes | Forward (5'–3')         | Reverse (5'–3')        |
|-------|-------------------------|------------------------|
| Nrf2  | TCTTGGAGTAAGTCGAGAAGTGT | GTTGAAACTGAGCGAAAAAGGC |
| HO-1  | GGAAATCATCCCTTGCACGC    | TGTTTGAACCTTGGTGGGGCT  |
| NQO-1 | AGGATGGGAGGTACTCGAATC   | AGGCGTCCTTCCTTATATGCTA |

|                |                             |                          |
|----------------|-----------------------------|--------------------------|
| Nr1            | AGAGCCCGACCCTAAAAAGAA       | CCCTCCTCCCTCTCAATAGC     |
| Nr2a           | ACGTGACAGAACGCGAACTT        | TCAGTGCGGTTTCATCAATAACG  |
| Nr2b           | GGCTCCGAGACTTCTACCTG        | GCTTATCGCCTGTTCCGT       |
| CAMK2A         | AAACACTCAACAAAATCAAACGAC    | GCCACAGAGAGACCAAAGCA     |
| CAMK2B         | GAGAACCTGAGATACTGGACGGAT    | ATTTCATCAAACACTTGTATGGAC |
|                | A                           | C                        |
| CAMK2D         | CATCTTGACAACACTATGCTGGCTACG | TTGATGATCTCCTGTTTTCGTGCT |
| NF- $\kappa$ B | ATGGCAGACGATGATCCCTAC       | TGTTGACAGTGGTATTTCTGGTG  |
| BDNF           | TCATACTTCGGTTGCATGAAGG      | TCATACTTCGGTTGCATGAAGG   |
| TrkB           | CTGGGGCTTATGCCTGCTG         | GTACACCAAATCCTAGCGGAAC   |
| RC3            | TCCAAGCCAGACGACGATATT       | CACACTCTCCGCTCTTTATCTTC  |
| Gap-43         | TGGTGTCAAGCCGGAAGATAA       | GCTGGTGCATCACCCCTTCT     |
| PSD-95         | TCTGTGCGAGAGGTAGCAGA        | AAGCACTCCGTGAACTCCTG     |
| SYNAPO         | CCTGCCCGTAACTTCCGTG         | GAGCGGCGGTAGGGAAAAG      |
| $\beta$ -actin | GGCTGTATTCCTCCATCG          | CCAGTTGGTAACAATGCCATG    |

- 
- 16 Nrf2: nuclear factor erythroid-derived 2-like 2, HO-1: heme oxygenase 1, NQO-1: NADPH quinone
- 17 oxidoreductase-1, Nr1: N-methyl-D-aspartate (NMDA) receptor 1, Nr2a: N-methyl-D-aspartate
- 18 (NMDA) receptor 2a, Nr2b: N-methyl-D-aspartate (NMDA) receptor 2b, CAMK2A:
- 19 Ca<sup>2+</sup>/calmodulin-dependent protein kinase II alpha chain, CAMK2B: Ca<sup>2+</sup>/calmodulin-dependent
- 20 protein kinase II beta chain, CAMK2D: Ca<sup>2+</sup>/calmodulin-dependent protein kinase II delta chain, NF-
- 21  $\kappa$ B: nuclear factor kappa B, BDNF: brain-derived neurotrophic factor, TrkB: tyrosine kinase receptor B,
- 22 RC3: neurogranin, Gap-43: neuromodulin, PSD-95: postsynaptic density protein 95, SYNAPO:

23 synaptopodin.

24 Table S3 <sup>1</sup>H chemical shift assignment of the metabolites of short-chain fatty acid production

25 pathways in feces

| Keys | Metabolites                              | Moieties                                                                                     | $\delta^1\text{H}$ (ppm) and multiplicity   | Annotated chemical shift (ppm) | Integral region (ppm) |
|------|------------------------------------------|----------------------------------------------------------------------------------------------|---------------------------------------------|--------------------------------|-----------------------|
| 1    | butyrate                                 | CH <sub>3</sub> , $\beta$ CH <sub>2</sub> , $\alpha$ CH <sub>2</sub>                         | 0.90(t), 1.56(m), 2.15(t)                   | 0.90(CH <sub>3</sub> )         | 0.88-0.92             |
| 2    | $\alpha$ -ketoisocaproate                | 2*CH <sub>3</sub> , CH, CH <sub>2</sub>                                                      | 0.92(d), 2.06(m), 2.61(d)                   | 2.61(CH <sub>2</sub> )         | 2.60-2.62             |
| 3    | propionate                               | CH <sub>3</sub> , CH <sub>2</sub>                                                            | 1.07(t), 2.19(q)                            | 1.07(CH <sub>3</sub> )         | 1.06-1.08             |
| 4    | $\alpha$ -keto- $\beta$ -methyl-valerate | $\delta$ CH <sub>3</sub> , $\gamma'$ CH <sub>3</sub> , $\gamma$ CH, $\gamma'$ CH, $\beta$ CH | 0.88(t), 1.10(d), 1.47(m), 1.69(m), 2.93(m) | 1.10(CH <sub>3</sub> )         | 1.10-1.11             |
| 5    | $\alpha$ -ketoisovalerate                | CH <sub>3</sub> , CH                                                                         | 1.13(d), 3.02(m)                            | 1.13(CH <sub>3</sub> )         | 1.12-1.13             |
| 6    | lactate                                  | $\alpha$ CH, $\beta$ CH <sub>3</sub>                                                         | 1.33(d), 4.11(q)                            | 1.33(CH <sub>3</sub> )         | 1.31-1.35             |
| 7    | acetate                                  | CH <sub>3</sub>                                                                              | 1.92(s)                                     | 1.92(CH <sub>3</sub> )         | 1.91-1.93             |
| 8    | 5-aminovalerate                          | 2CH <sub>2</sub> , 3CH <sub>2</sub> , 1CH <sub>2</sub> , 4CH <sub>2</sub>                    | 1.62(m), 1.65(m), 2.26(t), 3.02(t)          | 2.26(CH <sub>2</sub> )         | 2.25-2.27             |
| 9    | pyruvate                                 | CH <sub>3</sub>                                                                              | 2.37(s)                                     | 2.37(CH <sub>3</sub> )         | 2.37-2.38             |
| 10   | succinate                                | CH <sub>2</sub>                                                                              | 2.41(s)                                     | 2.41(CH <sub>2</sub> )         | 2.40-2.42             |
| 11   | malate                                   | $\beta$ CH <sub>2</sub>                                                                      | 2.38(dd), 2.70(dd)                          | 2.70(CH <sub>2</sub> )         | 2.69-2.71             |

---

|    |          |                                        |          |                        |           |
|----|----------|----------------------------------------|----------|------------------------|-----------|
|    |          | $\beta'$ CH <sub>2</sub> , $\alpha$ CH | 4.31(dd) |                        |           |
| 12 | malonate | CH <sub>2</sub>                        | 3.11(s)  | 3.11(CH <sub>2</sub> ) | 3.10-3.12 |
| 13 | fumarate | CH                                     | 6.52(s)  | 6.52(CH)               | 6.52-6.53 |
| 14 | formate  | CH                                     | 8.46(s)  | 8.46(CH)               | 8.46-8.47 |

---

26 s, singlet, d, doublet, t, triplet, q, quartet, dd, doublet of doublets, m, multiplet.

## 27 References

28 M. Di Buono, L. J. Wykes, R. O. Ball and P. B. Pencharz, Dietary cysteine reduces the methionine  
 29 requirement in men, *Am. J. Clin. Nutr.*, 2001, **74**, 761-766.
